# Supplementary material for: Inhibition of neutrophil extracellular trap formation alleviates vascular dysfunction in type 1 diabetic mice
Source: PubMed Central journal article supplement — Sci Adv. 2023 Oct 25;9(43):eadj1019. doi: 10.1126/sciadv.adj1019 (PMC10599623; doi:10.1126/sciadv.adj1019), 2023-10-25
Supplement: sciadv.adj1019_sm.pdf [file sciadv.adj1019_sm.pdf]

Supplementary Materials for  
**Inhibition of neutrophil extracellular trap formation alleviates vascular dysfunction in type 1 diabetic mice**

Chao Liu *et al.*

Corresponding author: Jason S. Knight, [jsknight@umich.edu](mailto:jsknight@umich.edu)

*Sci. Adv.* **9**, eadj1019 (2023)  
DOI: 10.1126/sciadv.adj1019

**This PDF file includes:**

Figs. S1 to S7

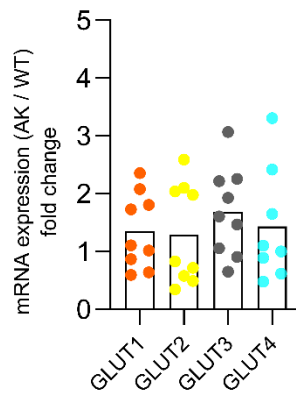

**Figure S1.**

**Gene expression of glucose transporters in Akita and WT neutrophils.** Relative mRNA coding for the indicated glucose transporters in bone-marrow neutrophils; mean for n=8-9 unique mice. Akita (AK) neutrophils were compared with WT neutrophils by unpaired Student's *t*-test and no significant difference were found.

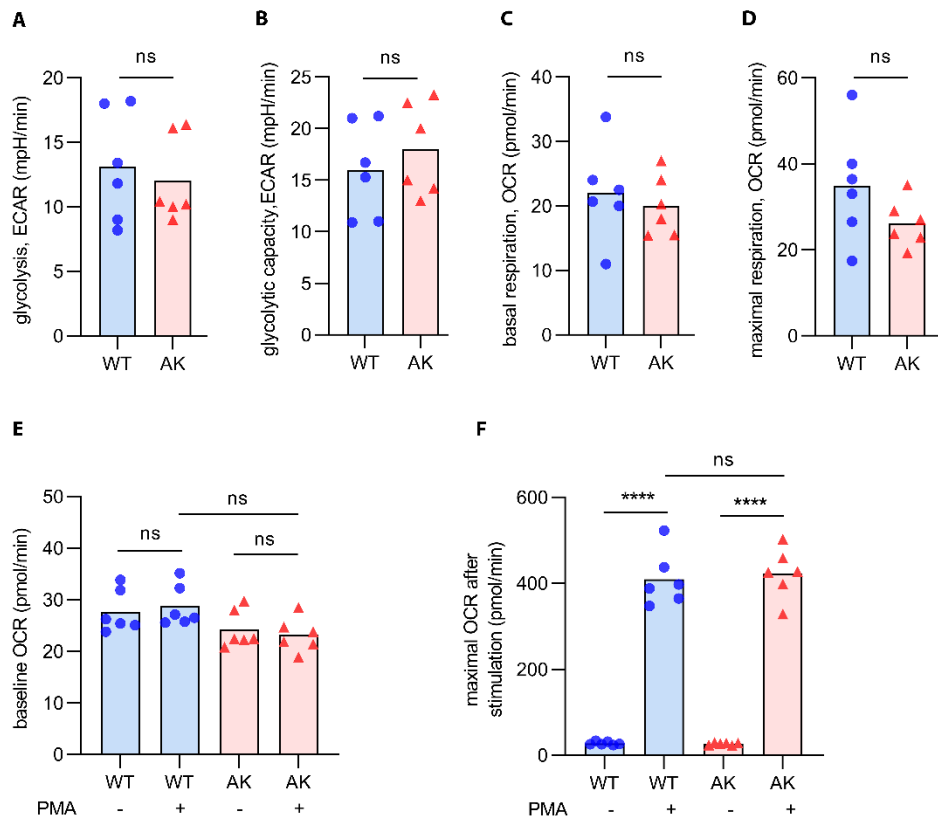

**Figure S2.**

**Bioenergetic characterization of neutrophils in 24-week-old Akita (AK) mice with the Seahorse extracellular flux analyzer.** Using the glycolysis stress test, **A**, baseline glycolysis, and **B**, glycolytic capacity was measured as an assessment of glycolysis. Using the mitochondrial stress test, **C**, basal respiration, and **D**, maximal respiration were measured as an assessment of mitochondrial respiration. For **A** to **D**, mean for n=6, ns=not significant, compared with WT mice by unpaired Student's *t*-test. In a different set of experiments, PBS or PMA was added to the neutrophils, and the oxygen consumption rate (OCR) was measured as an assessment of the oxidative burst, **E**, baseline OCR, which is the OCR before adding PBS or PMA and **F**, maximal OCR, which is the highest OCR after adding PBS or PMA. For **E** and **F**, mean for n=6, \*\*\*\* $p < 0.0001$  by one-way ANOVA followed by the Holm-Šidák test.

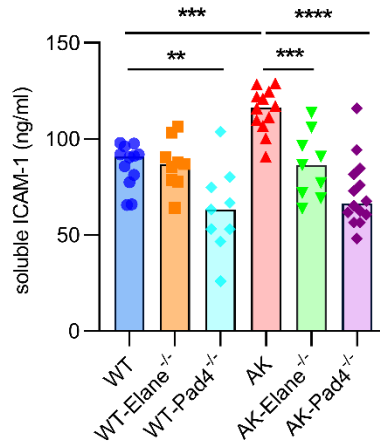

**Figure S3.**

**Decreased soluble ICAM-1 in Akita-*Elane*<sup>-/-</sup> and Akita-*Pad4*<sup>-/-</sup> aortae as compared with Akita (AK) aortae.** Values of soluble ICAM-1 by ELISA; mean for n=9-12, \*\* $p < 0.01$ , \*\*\* $p < 0.001$ , \*\*\*\* $p < 0.0001$  by one-way ANOVA followed by the Holm-Šidák test.

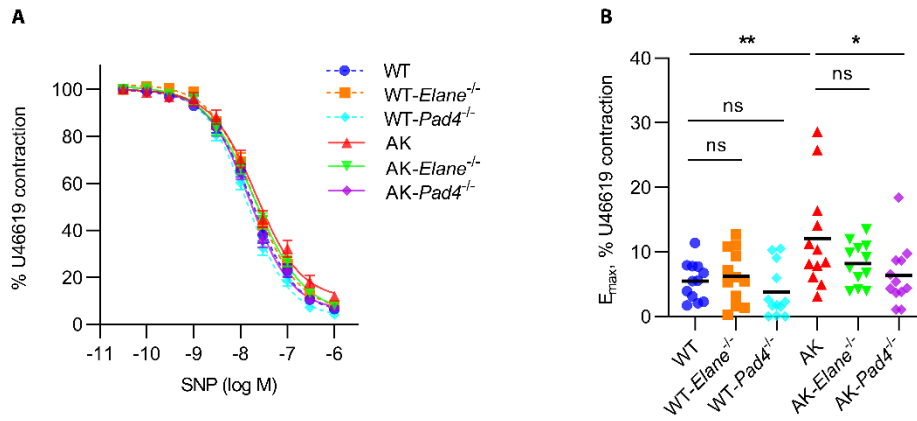

**Figure S4.**

**Relaxation of aortic rings in response to sodium nitroprusside.** **A**, Relaxation of aortic rings in response to sodium nitroprusside (SNP) after achieving a stable U46619 contraction plateau. Data are presented relative to the force remaining from the U46619 contraction, which was set as 100%; mean + SEM for n=12. **B**, Maximal efficacy ( $E_{max}$ ) values as determined by nonlinear regression analysis; mean for n=12, \* $p$ <0.05, \*\* $p$ <0.01 by one-way ANOVA followed by the Holm-Šídák test.

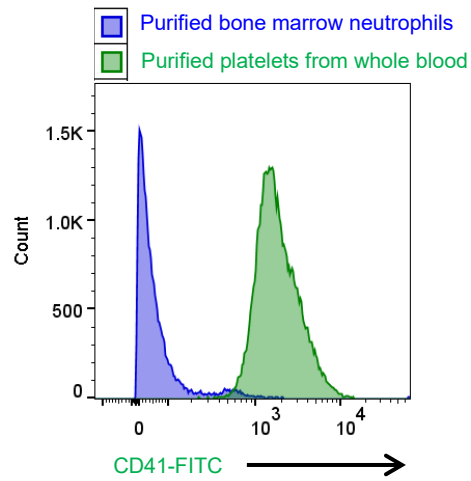

**Figure S5.**

**Assessment for platelet contamination of bone marrow neutrophils as were used for adoptive transfer experiments.** Either purified bone marrow neutrophils or platelets from whole blood were assessed by flow cytometry. Bone marrow neutrophils were consistently negative for any CD41 staining.

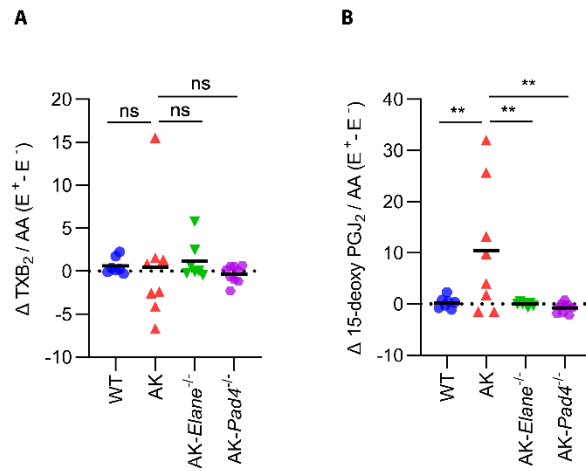

**Figure S6.**

**Delta values of detected TXB<sub>2</sub> and 15-deoxy-PGJ<sub>2</sub>.** Prostanoid metabolites were measured in endothelium-intact (E<sup>+</sup>) and endothelium-denuded (E<sup>-</sup>) aortae of 24-week-old mice by LC/ESI-MS/MS. The values of prostanoid metabolites detected were all normalized to arachidonic acid (AA) in the aorta. **A**, Delta values of TXB<sub>2</sub>, presented as endothelium-intact (E<sup>+</sup>) minus endothelium-denuded (E<sup>-</sup>). **B**, Delta values of detected 15-deoxy-PGJ<sub>2</sub>, presented as endothelium-intact (E<sup>+</sup>) minus endothelium-denuded (E<sup>-</sup>); mean for n=7-9, \*\**p*<0.01 by one-way ANOVA followed by the Holm-Šidák test, ns=non-significant.

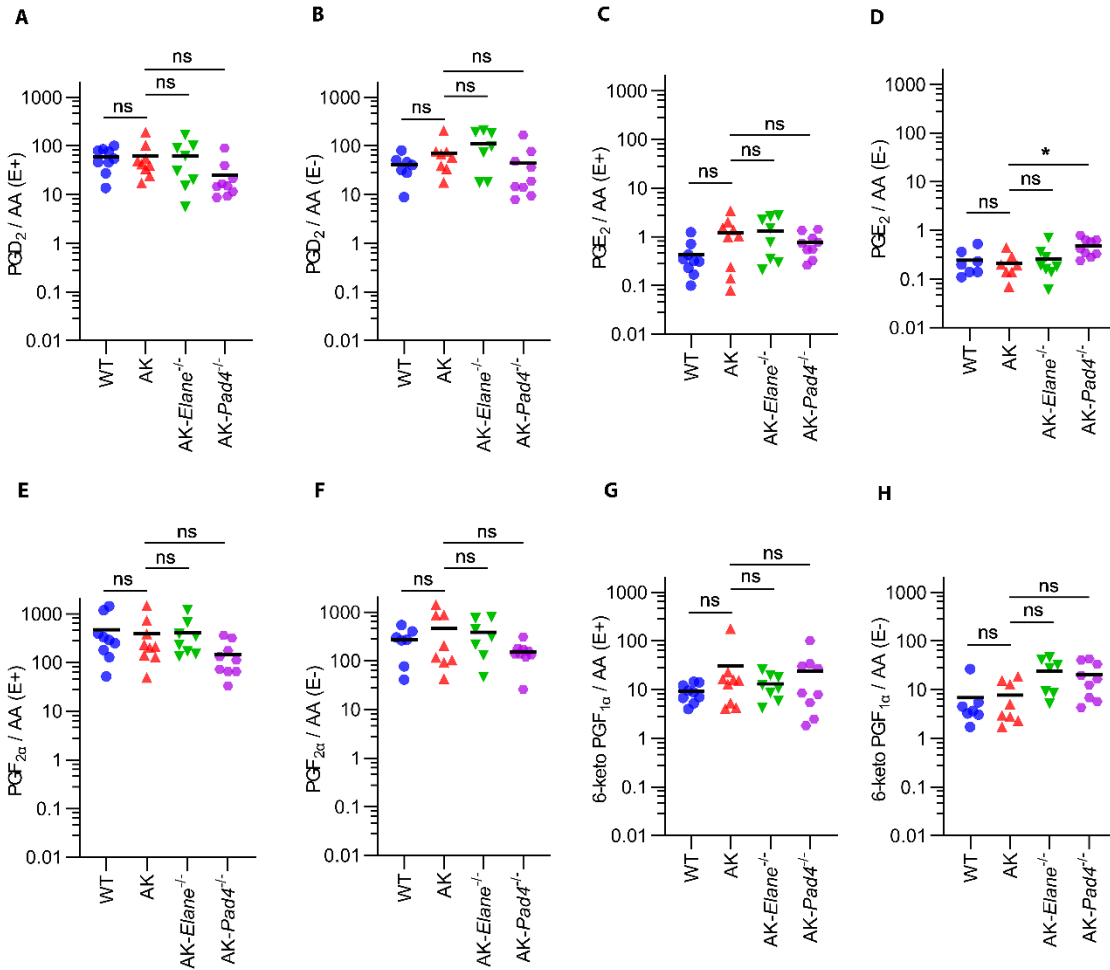

**Figure S7.**

**Other detected prostanooid metabolites.** Prostanoid metabolites were measured in endothelium-intact (E+) and endothelium-denuded (E-) aortae of 24-week-old mice by LC/ESI-MS/MS. The values of prostanooid metabolites detected were all normalized to arachidonic acid (AA) in the aorta. **A**, PGD<sub>2</sub>/AA in intact aortae. **B**, PGD<sub>2</sub>/AA in denuded aortae. **C**, PGE<sub>2</sub>/AA in intact aortae. **D**, PGE<sub>2</sub>/AA in denuded aortae. **E**, PGF<sub>2α</sub>/AA in intact aortae. **F**, PGF<sub>2α</sub>/AA in denuded aortae. **G**, 6-keto PGF<sub>1α</sub>/AA in intact aortae. **H**, 6-keto PGF<sub>1α</sub>/AA in denuded aortae. For **A-H**, mean for n=7-9, \**p*<0.05 by one-way ANOVA followed by the Holm-Šidák test, ns=non-significant.
